# Supplementary material
Source: Springer Nature journal article supplement (https://www.springermedizin.de/resource/supplementary/12885_2013_4475_MOESM6_ESM.pdf/9466514)

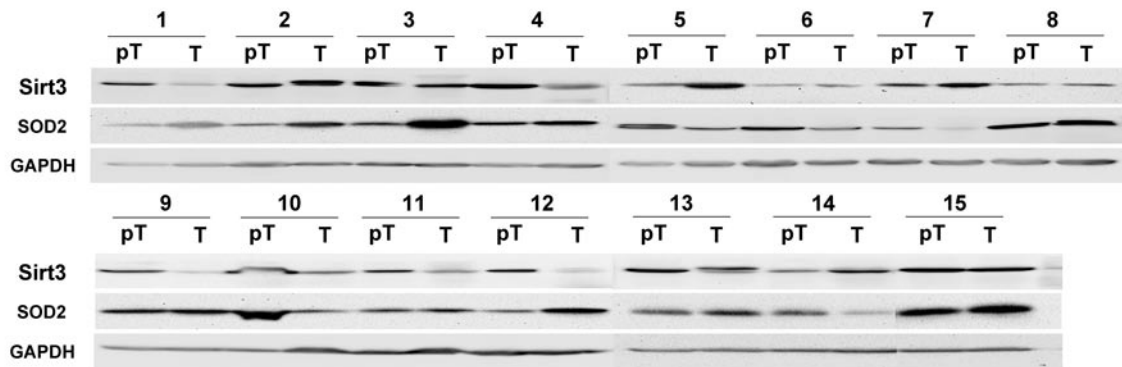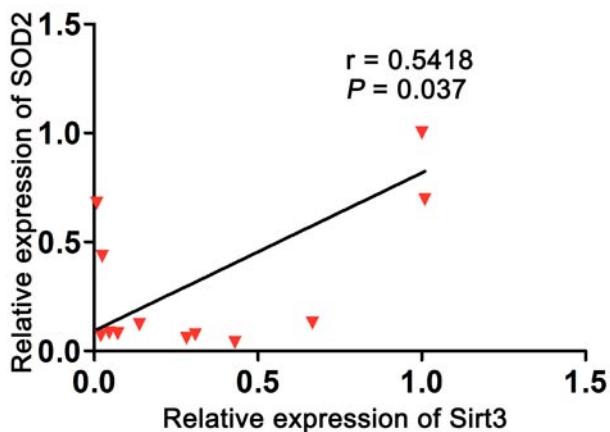

Supplement: MOESM6 [file 9466514]
